# Supplementary material for: Carrier re-sequencing reveals rare but benign variants in recessive deafness genes
Source: PubMed Central journal article supplement (PMC5595904; doi:10.1038/s41598-017-10099-2), 2017-09-12
Supplement: 41598_2017_10099_MOESM1_ESM.pdf [file 41598_2017_10099_MOESM1_ESM.pdf]

# Carrier re-sequencing reveals rare but benign variants in recessive deafness genes

Longxia He<sup>1,2,3,4</sup>, Xiuhong Pang<sup>5</sup>, Penghui Chen<sup>1,2,3,4</sup>, Xiaowen Wang<sup>1,2,3,4</sup>, Tao Yang<sup>\*1,2,3,4</sup> and Hao Wu<sup>\*1,2,3</sup>

<sup>1</sup>Department of Otorhinolaryngology-Head and Neck Surgery, Shanghai Ninth People's Hospital, Shanghai Jiaotong University School of Medicine, Shanghai, China

<sup>2</sup>Ear Institute, Shanghai Jiaotong University School of Medicine, Shanghai, China

<sup>3</sup>Shanghai Key Laboratory of Translational Medicine on Ear and Nose Diseases, Shanghai, China

<sup>4</sup> Department of Otolaryngology-Head and Neck Surgery, Xinhua Hospital, Shanghai Jiaotong University School of Medicine, Shanghai, China

<sup>5</sup>Department of Otorhinolaryngology-Head and Neck Surgery, Taizhou People's Hospital, Jiangsu Province, China

## **\*Corresponding Authors:**

Tao Yang, Ear Institute, Shanghai Jiaotong University School of Medicine, Shanghai, China.

Email: yangtfxl@sina.com, Tel: 86-21-25078893, Fax: 86-21-65152394

Hao Wu, Department of Otolaryngology-Head & Neck Surgery, Shanghai Ninth People's Hospital, Shanghai Jiaotong University School of Medicine, Shanghai, China. Email:

wuhao622@sina.cn, Tel: 86-21-55570010, Fax: +86-21-65152394

**Supplementary Table S1.** Non-synonymous variants *in trans* with the pathogenic

variants in the normal hearing carriers

| Carriers | Gene          | Reference transcript | Nucleotide change          | Amino acid change | MAF (GnomAD) | MAF (NHLBI) |
|----------|---------------|----------------------|----------------------------|-------------------|--------------|-------------|
| C212-2   | <i>PTPRQ</i>  | NM_001145026         | <b>c.5426+1G&gt;A*</b>     | -                 | 0            | 0           |
| C271-4   | <i>LOXHD1</i> | NM_001145472         | c.2650T>C                  | p.F884L           | 0.3803       | 0.410206    |
|          |               |                      | <b>c.2352delC</b>          | <b>p.D784fs</b>   | 0            | 0           |
|          |               |                      | c.1535A>G                  | p.E512G           | 0.08416      | 0.088042    |
| C310-1   | <i>CDH23</i>  | NM_022124            | c.797G>A                   | p.R266Q           | 0.000241     | 0.000657    |
|          |               |                      | c.130A>G                   | p.R44G            | 0.7675       | 0.771572    |
|          |               |                      | <b>c.3241C&gt;T</b>        | <b>p.R1081X</b>   | 0            | 0           |
| D1335-1  | <i>PCDH15</i> | NM_001142767         | c.1469G>C                  | p.G490A           | 0.1998       | 0.121193    |
|          |               |                      | c.4051A>G                  | p.N1351D          | 0.8159       | 0.812899    |
|          |               |                      | c.4723G>A                  | p.A1575T          | 0.7752       | 0.741081    |
|          |               |                      | c.6130G>A                  | p.E2044K          | 0.3111       | 0.265481    |
|          |               |                      | c.7073G>A                  | p.R2358Q          | 0.3081       | 0.262008    |
|          |               |                      | c.7139C>T                  | p.P2380L          | 0.2997       | 0.254335    |
|          |               |                      | c.9373T>C                  | p.F3125L          | 0.06972      | 0.025518    |
|          |               |                      | <b>c.4941_4942 insATCA</b> | <b>p.E1648fs</b>  | 0            | 0           |
| D1335-4  | <i>PCDH15</i> | NM_001142767         | c.4853A>C                  | p.E1618A          | 0.2489       | 0.148641    |
|          |               |                      | c.2675G>A                  | p.R892Q           | 0.2562       | 0.211133    |
|          |               |                      | c.1027G>A                  | p.G343S           | 0.1656       | 0.234353    |
|          |               |                      | c.55T>G                    | p.S19A            | 0.2181       | 0.216054    |
| D1680-2  | <i>MYO7A</i>  | NM_000260            | <b>c.3657dupC</b>          | <b>p.G1219fs</b>  | 0            | 0           |
|          |               |                      | c.47T>C                    | p.L16S            | 0.4348       | 0.468586    |
|          |               |                      | <b>c.990C&gt;A</b>         | <b>p.Y330X</b>    | 0            | 0           |
| D715-2   | <i>TECTA</i>  | NM_005422            | c.1111A>G                  | p.R371G           | 0.403        | 0.497309    |
|          |               |                      | c.2795T>C                  | p.V932A           | 0.2141       | 0.1984      |
|          |               |                      | c.5171G>A                  | p.S1724N          | 0.9927       | 0.992079    |
| D715-3   | <i>TECTA</i>  | NM_005422            | <b>c.990C&gt;A</b>         | <b>p.Y330X</b>    | 0            | 0           |
|          |               |                      | c.5171G>A                  | p.S1724N          | 0.9927       | 0.992079    |

|         |                |              |                       |                      |               |          |
|---------|----------------|--------------|-----------------------|----------------------|---------------|----------|
| C54-1   | <i>PCDH15</i>  | NM_001142767 | <b>c.5506 C&gt;T</b>  | <b>p.Q1836X</b>      | 0.000008      | 0        |
|         |                |              | c.2675G>A             | p.R892Q              | 0.2562        | 0.211133 |
|         |                |              | c.1193A>C             | p.D398A              | 0.238         | 0.131632 |
| D1735-2 | <i>CDH23</i>   | NM_022124    | <b>c.6604G&gt;A</b>   | <b>p.D2202N</b>      | 0.000008      | 0        |
|         |                |              | c.4051A>G             | p.N1351D             | 0.8159        | 0.812899 |
|         |                |              | c.4723G>A             | p.A1575T             | 0.7752        | 0.741081 |
|         |                |              | c.5418C>G             | p.D1806E             | 0.01445       | 0.012923 |
| D1735-3 | <i>CDH23</i>   | NM_022124    | <b>c.6604G&gt;A</b>   | <b>p.D2202N</b>      | 0.000008      | 0        |
|         |                |              | c.3895G>A             | p.V1299I             | 0.000191      | 0.000397 |
|         |                |              | c.4051A>G             | p.N1351D             | 0.8159        | 0.812899 |
|         |                |              | c.4723G>A             | p.A1575T             | 0.7752        | 0.741081 |
| F14-1   | <i>TECTA</i>   | NM_005422    | <b>c.2719C&gt;T</b>   | <b>p.R907X</b>       | 0.000008      | 0        |
|         |                |              | c.5171G>A             | p.S1724N             | 0.9927        | 0.992079 |
| D1852-2 | <i>OTOF</i>    | NM_194322    | <b>c. 4817 G&gt;A</b> | <b>p.W1606X</b>      | 0             | 0        |
|         |                |              | c.62C>T               | p.P21L               | 0.5512        | 0.411    |
| D1852-3 | <i>OTOF</i>    |              | <b>c. 1273 C&gt;T</b> | <b>p.R425X</b>       | 0.000016      | -        |
|         |                |              | c.62C>T               | p.P21L               | 0.5512        | 0.411    |
| D1913-2 | <i>TECTA</i>   | NM_005422    | <b>c.6250+2T&gt;G</b> | -                    | 0             | 0        |
|         |                |              | c.5171G>A             | p.S1724N             | 0.9927        | 0.992079 |
| D1913-3 | <i>TECTA</i>   | NM_005422    | <b>c.6250+2T&gt;G</b> | -                    | 0             | 0        |
|         |                |              | c.1111A>G             | p.R371G              | 0.403         | 0.497309 |
|         |                |              | c.2795T>C             | p.V932A              | 0.2141        | 0.1984   |
|         |                |              | c.5171G>A             | p.S1724N             | 0.9927        | 0.992079 |
| D1597-4 | <i>SLC26A4</i> | NM_000441    | <b>c.919-2A&gt;G</b>  | -                    | 0.000305      | 0        |
|         |                |              | c.1300G>A             | p.A434T              | 0.000024      | 0        |
| D1803-3 | <i>MYO15A</i>  | NM_016239    | <b>c.6371G&gt;A</b>   | <b>p.R2124Q</b>      | 0             | 0.000078 |
|         |                |              | c.286A>C              | p.K96Q               | 0.000013      | 0        |
|         |                |              | c.3413A>G             | p.Q1138R             | 0.0142        | 0.014576 |
| D1964-3 | <i>MYO15A</i>  | NM_016239    | <b>c.3524dupA</b>     | <b>p.S1176Vfs*14</b> | <b>0.0002</b> | 0        |
|         |                |              | c.5929T>C             | p.C1977R             | 0.7395        | 0.196594 |
|         |                |              | c.6052G>A             | p.G2018R             | 0.2572        | 0.122405 |
| D2055-3 | <i>MYO15A</i>  | NM_016239    | <b>c.9315dupC</b>     | <b>p.H3106Pfs*2</b>  | 0             | 0        |
|         |                |              | c.1783G>A             | p.A595T              | 0.5289        | 0.335434 |
|         |                |              | c.2152T>G             | p.W718G              | 0.6112        | 0        |

|         |         |              |                       |                  |          |          |
|---------|---------|--------------|-----------------------|------------------|----------|----------|
|         |         |              | c.5929T>C             | p.C1977R         | 0.7395   | 0.196594 |
|         |         |              | c.6052G>A             | p.G2018R         | 0.2572   | 0.122405 |
| D2025-3 | MYO7A   | NM_000260    | <b>c.3987C&gt;A</b>   | <b>p.Y1329X</b>  | 0        | 0        |
|         |         |              | c.4996A>T             | p.S1666C         | 0.5440   | 0.410888 |
| D2026-3 | MYO15A  | NM_016239    | <b>c.8767C&gt;T</b>   | <b>p.R2923X</b>  | 0.000013 | 0.00008  |
|         |         |              | c.1783G>A             | p.A595T          | 0.5289   | 0.335434 |
|         |         |              | c.2152T>G             | p.W718G          | 0.6112   | 0        |
|         |         |              | c.5929T>C             | p.C1977R         | 0.7395   | 0.196594 |
|         |         |              | c.6052G>A             | p.G2018R         | 0.2572   | 0.122405 |
| D918-2  | GJB2    | NM_004004    | <b>c.235delC</b>      | <b>p.L79Cfs</b>  | 0.0004   | 0        |
|         |         |              | c.368C>A              | p.T123N          | 0.000464 | 0.000154 |
| C212-3  | PTPRQ   | NM_001145026 | <b>c.4090delA</b>     | <b>p.K1364fs</b> | 0        | 0        |
| D1597-2 | SLC26A4 | NM_000441    | <b>c.915insG</b>      | <b>p.V306fs</b>  | 0.000016 | 0        |
| D1597-3 | SLC26A4 | NM_000441    | <b>c.919-2A&gt;G</b>  | -                | 0.000305 | 0        |
| D1803-2 | MYO15A  | NM_016239    | <b>c.9690+1G&gt;A</b> | -                | 0        | 0        |
| D1964-2 | MYO15A  | NM_016239    | <b>c.4441T&gt;C</b>   | <b>p.S1481P</b>  | 0.000008 | 0        |
| D1607-2 | ILDRI   | NM_001199799 | <b>c.234C&gt;A</b>    | <b>p.Y78X</b>    | 0        | 0        |
| D856-2  | MYO15A  | NM_016239    | <b>c.8767C&gt;T</b>   | <b>p.R2923X</b>  | 0.00008  | 0        |

\*The well-established pathogenic variants were marked in bold. The variants not in bold were *in trans* to the pathogenic variants and were presumed benign.

**Supplementary Table S2.** The 144 genes targeted by next-generation sequencing for deafness

|                              |                             |                            |                             |                             |                             |                              |
|------------------------------|-----------------------------|----------------------------|-----------------------------|-----------------------------|-----------------------------|------------------------------|
| <i>ACTG1<sup>D</sup></i>     | <i>COL9A1<sup>R</sup></i>   | <i>FGF8<sup>D</sup></i>    | <i>HSD17B4<sup>R</sup></i>  | <i>MYO15A<sup>R</sup></i>   | <i>PROKR2<sup>D/R</sup></i> | <i>TBC1D24<sup>D/R</sup></i> |
| <i>ALX3<sup>R</sup></i>      | <i>COL9A2<sup>D/R</sup></i> | <i>FGFR1<sup>D</sup></i>   | <i>IL13<sup>D</sup></i>     | <i>MYO1A<sup>D</sup></i>    | <i>PRPS1<sup>XLR</sup></i>  | <i>TCOF1<sup>D</sup></i>     |
| <i>BSND<sup>R</sup></i>      | <i>COMT2<sup>R</sup></i>    | <i>FGFR3<sup>D</sup></i>   | <i>ILDR1<sup>R</sup></i>    | <i>MYO3A<sup>R</sup></i>    | <i>PTPRQ<sup>R</sup></i>    | <i>TECTA<sup>D/R</sup></i>   |
| <i>CABP2<sup>R</sup></i>     | <i>CRYM<sup>D</sup></i>     | <i>FLNA<sup>XLR</sup></i>  | <i>KARS<sup>R</sup></i>     | <i>MYO6<sup>D/R</sup></i>   | <i>RDX<sup>R</sup></i>      | <i>TIMM8A<sup>XLR</sup></i>  |
| <i>CCDC50<sup>D</sup></i>    | <i>DFNA5<sup>D</sup></i>    | <i>FOXI1<sup>R</sup></i>   | <i>KCNE1<sup>R</sup></i>    | <i>MYO7A<sup>D/R</sup></i>  | <i>RPGR<sup>XLD</sup></i>   | <i>TJP2<sup>R</sup></i>      |
| <i>CDH23<sup>R</sup></i>     | <i>DFNB31<sup>R</sup></i>   | <i>FREM1<sup>R</sup></i>   | <i>KCNJ10<sup>R</sup></i>   | <i>NDP<sup>XLR</sup></i>    | <i>SALL1<sup>D</sup></i>    | <i>TMC1<sup>D/R</sup></i>    |
| <i>CEACAM16<sup>D</sup></i>  | <i>DFNB59<sup>R</sup></i>   | <i>GATA3<sup>D</sup></i>   | <i>KCNQ1<sup>D</sup></i>    | <i>NF2<sup>D</sup></i>      | <i>SALL4<sup>D</sup></i>    | <i>TMIE<sup>R</sup></i>      |
| <i>CHD7<sup>D</sup></i>      | <i>DIABLO<sup>D</sup></i>   | <i>GIPC3<sup>R</sup></i>   | <i>KCNQ4<sup>D</sup></i>    | <i>OTOA<sup>R</sup></i>     | <i>SANS<sup>R</sup></i>     | <i>TMPRSS3<sup>R</sup></i>   |
| <i>CIB2<sup>R</sup></i>      | <i>DIAPH1<sup>D</sup></i>   | <i>GJB2<sup>D/R</sup></i>  | <i>KRT9<sup>D</sup></i>     | <i>OTOF<sup>R</sup></i>     | <i>SEC23A<sup>R</sup></i>   | <i>TNC<sup>D</sup></i>       |
| <i>CLDN14<sup>R</sup></i>    | <i>DIAPH3<sup>D</sup></i>   | <i>GJB3<sup>D/R</sup></i>  | <i>LAMA3<sup>R</sup></i>    | <i>P2RX2<sup>D</sup></i>    | <i>SEMA3E<sup>D</sup></i>   | <i>TPRN<sup>R</sup></i>      |
| <i>CLPP<sup>R</sup></i>      | <i>DSPP<sup>D</sup></i>     | <i>GJB6<sup>D/R</sup></i>  | <i>LARS2<sup>R</sup></i>    | <i>PABPN1<sup>D</sup></i>   | <i>SERPINB6<sup>R</sup></i> | <i>TRIOBP<sup>R</sup></i>    |
| <i>CLRN1<sup>R</sup></i>     | <i>ECM1<sup>R</sup></i>     | <i>GPR98<sup>R</sup></i>   | <i>LHFPL5<sup>D</sup></i>   | <i>PAX3<sup>D/R</sup></i>   | <i>SIX1<sup>D</sup></i>     | <i>TRMU<sup>R</sup></i>      |
| <i>COCH<sup>D</sup></i>      | <i>EDN3<sup>D/R</sup></i>   | <i>GPSM2<sup>R</sup></i>   | <i>LOXHD1<sup>R</sup></i>   | <i>PCDH15<sup>R</sup></i>   | <i>SIX5<sup>D</sup></i>     | <i>TSPEAR<sup>R</sup></i>    |
| <i>COL11A1<sup>D/R</sup></i> | <i>EDNRB<sup>D/R</sup></i>  | <i>GRHL2<sup>D</sup></i>   | <i>LRTOMT<sup>R</sup></i>   | <i>PDZD7<sup>R</sup></i>    | <i>SLC17A8<sup>D</sup></i>  | <i>USH1C<sup>R</sup></i>     |
| <i>COL11A2<sup>D/R</sup></i> | <i>ELMOD3<sup>R</sup></i>   | <i>GRXCRI<sup>R</sup></i>  | <i>MARVELD2<sup>R</sup></i> | <i>PNPT1<sup>R</sup></i>    | <i>SLC26A4<sup>R</sup></i>  | <i>USH1G<sup>R</sup></i>     |
| <i>COL2A1<sup>D</sup></i>    | <i>ESPN<sup>R</sup></i>     | <i>HARS<sup>R</sup></i>    | <i>MIR96<sup>D</sup></i>    | <i>POLR1C<sup>R</sup></i>   | <i>SLC26A5<sup>R</sup></i>  | <i>USH2A<sup>R</sup></i>     |
| <i>COL4A3<sup>D/R</sup></i>  | <i>ESRRB<sup>R</sup></i>    | <i>HARS2<sup>R</sup></i>   | <i>MITF<sup>D</sup></i>     | <i>POLR1D<sup>D</sup></i>   | <i>SMPX<sup>XLD</sup></i>   | <i>WFS1<sup>D</sup></i>      |
| <i>COL4A4<sup>R</sup></i>    | <i>EYA1<sup>D</sup></i>     | <i>HGF<sup>R</sup></i>     | <i>MSRB3<sup>R</sup></i>    | <i>POU3F4<sup>XLR</sup></i> | <i>SNAI2<sup>R</sup></i>    | <i>WHRN<sup>R</sup></i>      |
| <i>COL4A5<sup>XLR</sup></i>  | <i>EYA4<sup>D</sup></i>     | <i>HMX1<sup>R</sup></i>    | <i>MYH14<sup>D</sup></i>    | <i>POU4F3<sup>D</sup></i>   | <i>SOX10<sup>D</sup></i>    | <i>NELL2<sup>U</sup></i>     |
| <i>COL4A6<sup>XLR</sup></i>  | <i>FGF3<sup>R</sup></i>     | <i>HOXA2<sup>D/R</sup></i> | <i>MYH9<sup>D</sup></i>     | <i>PROK2<sup>D</sup></i>    | <i>STRC<sup>R</sup></i>     | <i>KITLG<sup>D</sup></i>     |
| <i>COL1A1<sup>D</sup></i>    | <i>COL1A2<sup>D</sup></i>   | <i>OTOG<sup>R</sup></i>    | <i>OTOGL<sup>R</sup></i>    |                             |                             |                              |

D: autosomal dominant, n=48; R: autosomal recessive, n=69; D/R: autosomal dominant or recessive, n=17; XLD: X-linked dominant, n=2; XLR: X-linked recessive, n=7
